# Supplementary material for: Characterization of brown adipose tissue thermogenesis in the naked mole-rat (Heterocephalus glaber), a heterothermic mammal
Source: PubMed Central journal article supplement (PMC7656259; doi:10.1038/s41598-020-74929-6), 2020-11-10
Supplement: 41598_2020_74929_MOESM1_ESM.pdf [file 41598_2020_74929_MOESM1_ESM.pdf]

## **Supplementary Material**

### **Manuscript titles**

Characterization of brown adipose tissue thermogenesis in the naked mole-rat

(*Heterocephalus glaber*), a heterothermic mammal

### **Authors**

Yuki Oiwa, Kaori Oka, Hironobu Yasui, Kei Higashikawa, Hidemasa Bono, Yoshimi

Kawamura, Shingo Miyawaki, Akiyuki Watarai, Takefumi Kikusui, Atsushi Shimizu,

Hideyuki Okano, Yuji Kuge, Kazuhiro Kimura, Yuko Okamatsu-Ogura and Kyoko Miura

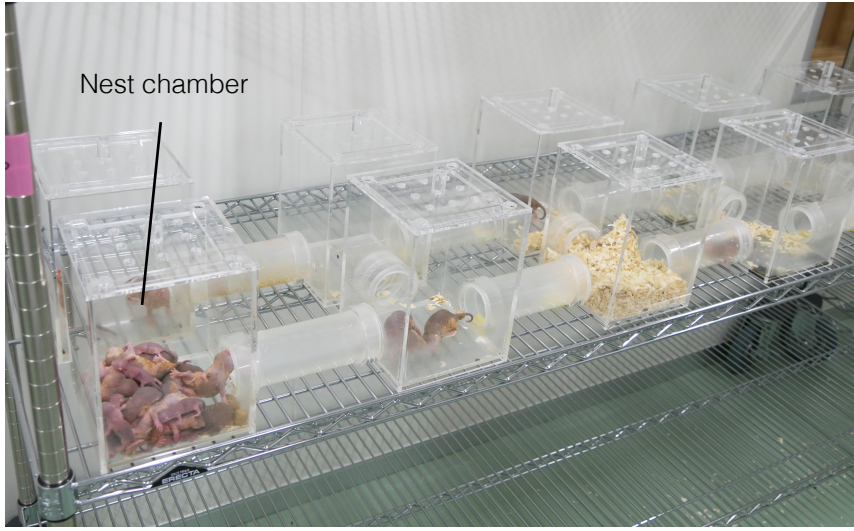

Nest chamber

**Figure S1. Images of acrylic chambers connected by acrylic tunnels used to house the naked mole-rats (NMRs; *Heterocephalus glaber*) in the laboratory**

The NMRs were housed in acrylic chambers maintained at  $30 \pm 0.5^{\circ}\text{C}$ , each of which was assigned a different use. In the nest chamber, NMRs shared heat and became warm by huddling together.

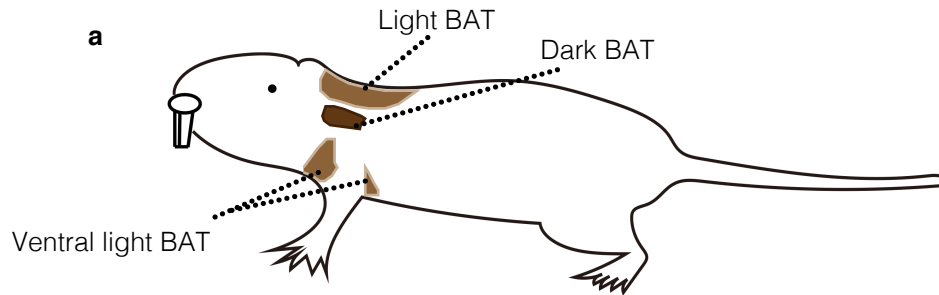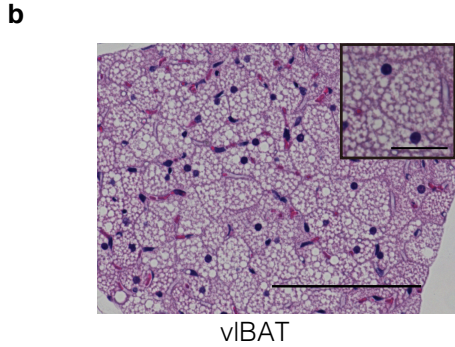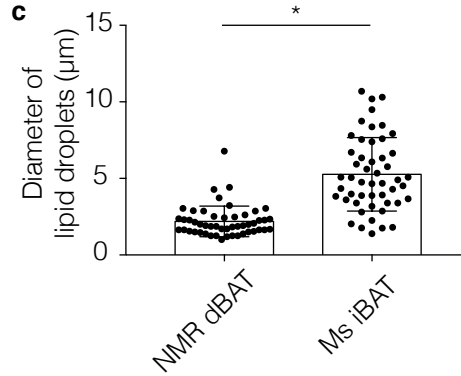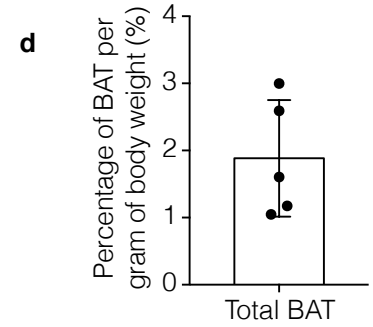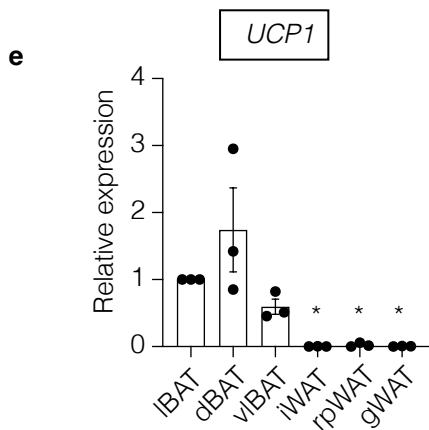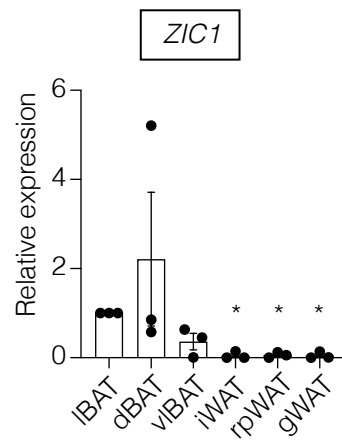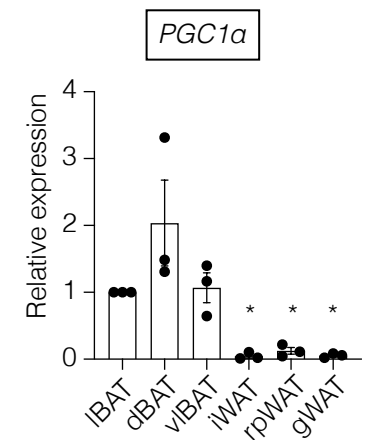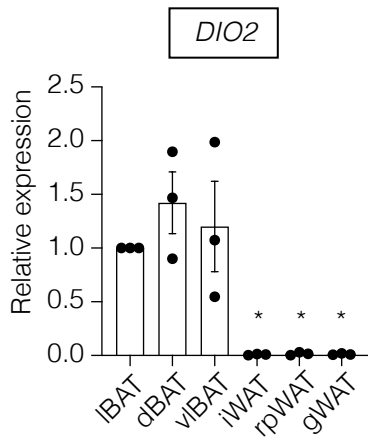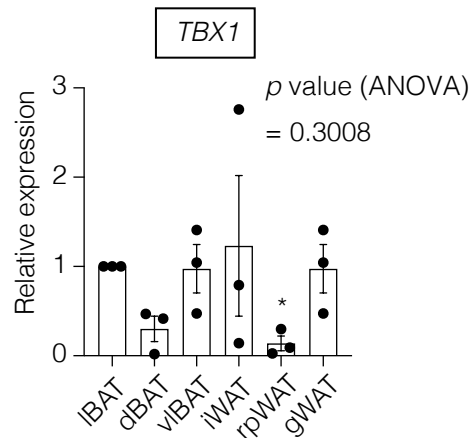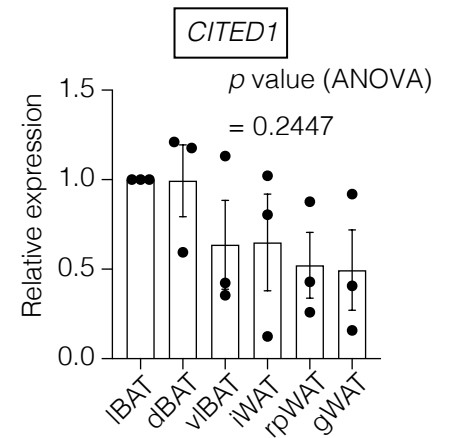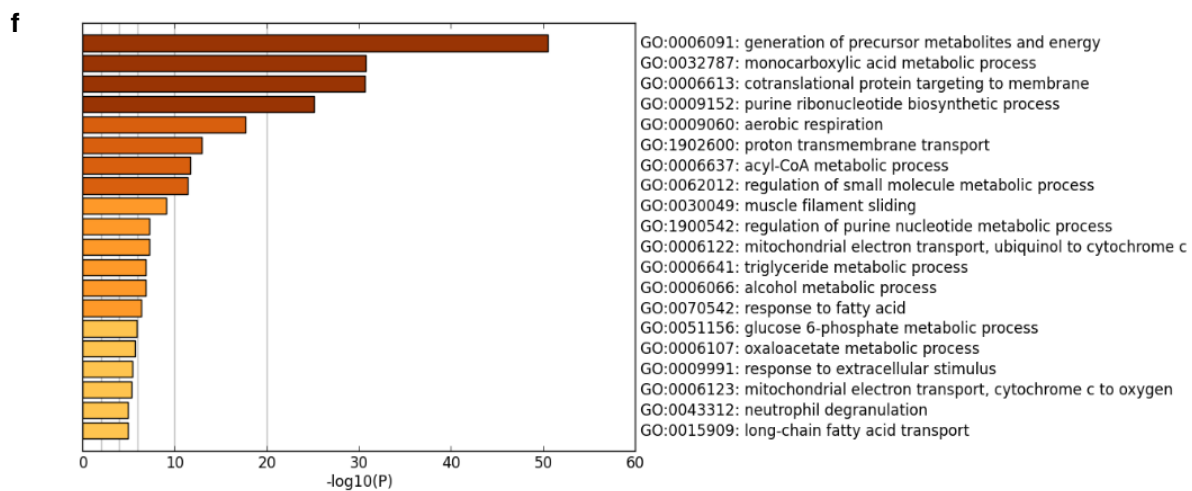

**Figure S2. Characterization of naked mole-rat (NMR; *Heterocephalus glaber*)**

**brown adipose tissue (BAT)**

**(a)** Schematic diagram showing the location of BAT in NMRs. **(b)** Hematoxylin-eosin

(HE)-stained images of ventral light BAT (vIBAT). Scale bar = 100  $\mu$ m for the HE-

stained image, 25  $\mu$ m for inset. **(c)** Lipid droplet size in NMR dBAT and mouse-

interscapular BAT (Ms iBAT). A total of 50 droplets were measured from three different

fields of view per tissue type. The data were analyzed using an unpaired *t*-test. **(d)**

Percentage of total BAT (sum of light BAT [lBAT], dark BAT [dBAT], and vIBAT) per

gram body weight. The data are presented as means  $\pm$  SD (*n* = 5 animals). **(e)** Relative

expression levels of brown or beige adipocyte marker genes reported in mouse and

human in NMR adipose tissues. Expression levels were quantified by quantitative

polymerase chain reaction (qPCR) using the primers listed in Table S1 and were

normalized to beta-actin (*ACTB*) and the value of lBAT (*n* = 3 animals). ingWAT,

inguinal white adipose tissue (WAT); gWAT, gonadal WAT; rpWAT, retroperitoneal

WAT. The data are presented as means  $\pm$  SEM and were analyzed using one-way

analysis of variance followed by Dunnett's multiple comparison test with a single

pooled variance (\*  $p < 0.05$  significantly different from IBAT). **(f)** Gene Ontology enrichment analysis of the top 200 upregulated genes in the dBAT. The calculated TPM of dBAT was compared with that of iWAT, and the top 200 upregulated genes in dBAT were analyzed by Metascape using gene ontology annotation of the mouse.

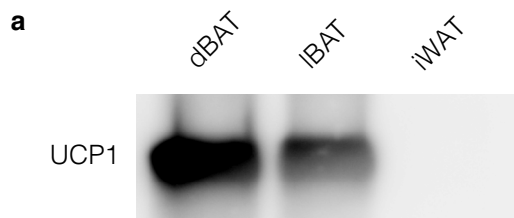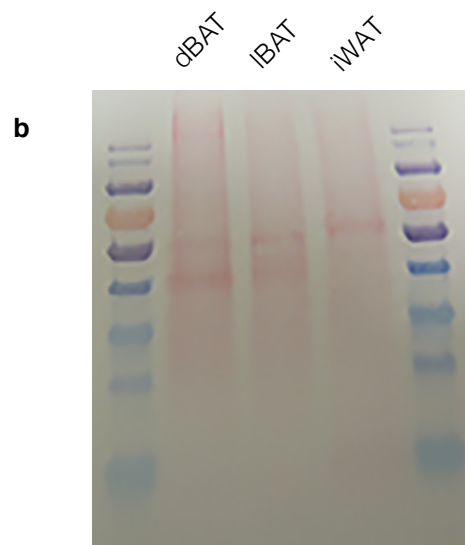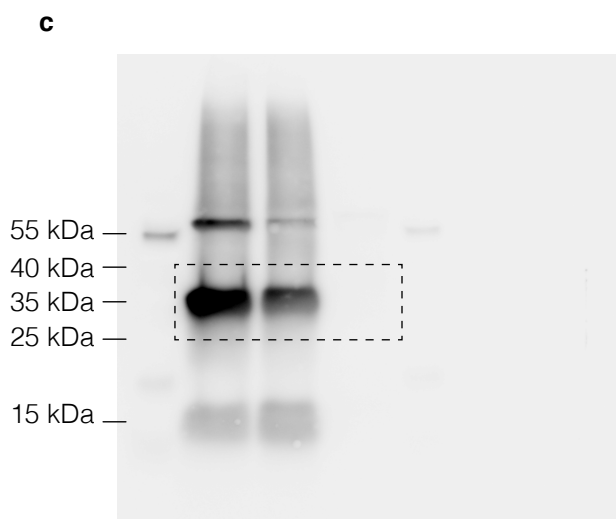

**Figure S3. Uncoupling protein 1 (UCP1) expression in the naked mole-rat (NMR;**

***Heterocephalus glaber*)**

**(a)** UCP1 expression was evaluated by western blotting in NMR dBAT, NMR IBAT, and

NMR iWAT. **(b)** Ponceau-S staining was performed for the membrane used in (a) after

the UCP1 detection. **(c)** Uncropped scanned results of western blot (a).



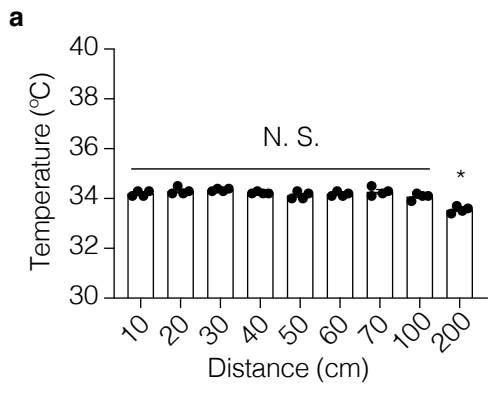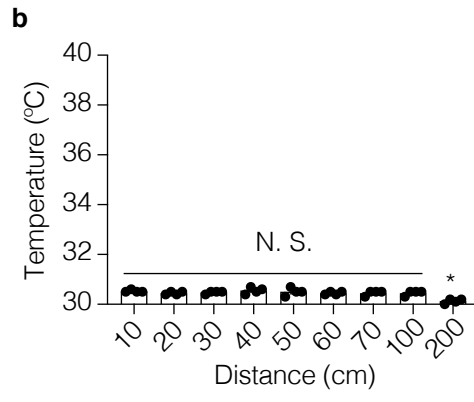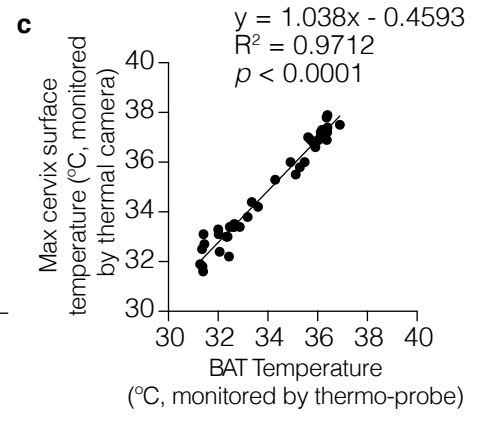

**Figure S4. Correlation between brown adipose tissue (BAT) temperatures monitored with a thermoprobe and cervix surface temperatures monitored with a thermal camera**

**(a, b)** Temperatures of the thermostable objects (**a**; 34.6–34.9°C, **b**; 31°C, measured by a mercury thermometer) were monitored by the thermal camera at various distances (four technical replicates at each point). Data are presented as means  $\pm$  SEM and analyzed using one-way analysis of variance followed by Dunnett's multiple comparison test with a single pooled variance (\*  $p < 0.05$  significantly different from 10 cm). **(c)** BAT temperatures and the maximum cervix surface temperatures of anesthetized subordinates were simultaneously recorded by a thermoprobe and thermal camera, respectively, every 1 min during the increase in body temperature, following the injection of 1 mg/kg noradrenaline ( $n = 3$  animals). Simple linear regression analysis was performed.  $R^2$ ; coefficient determination.

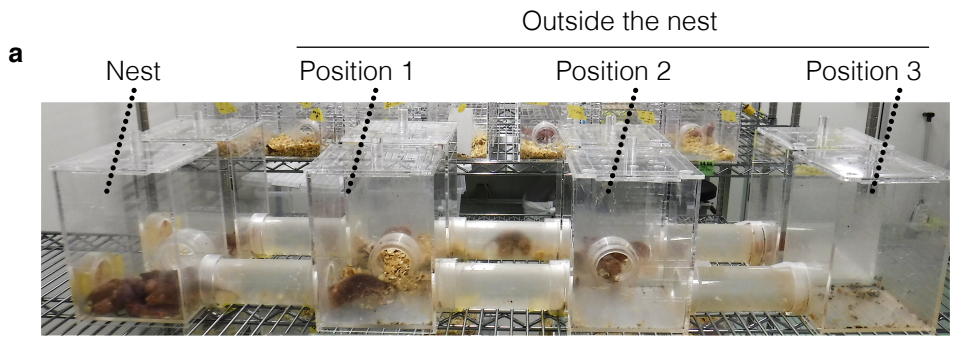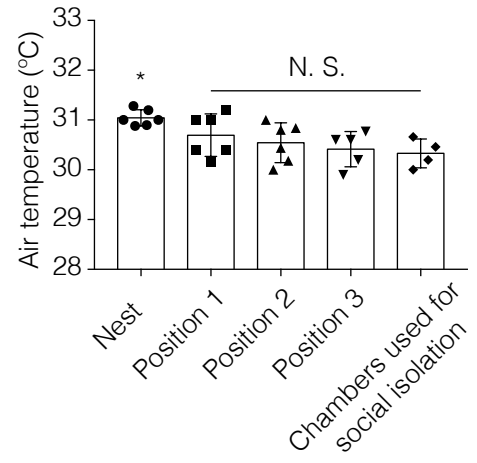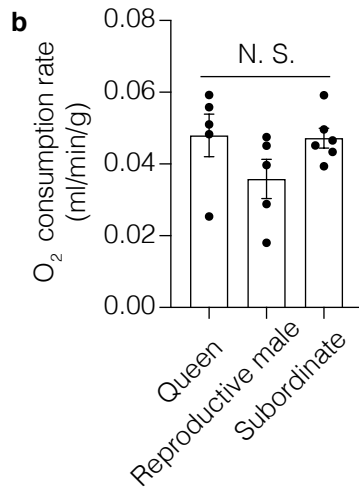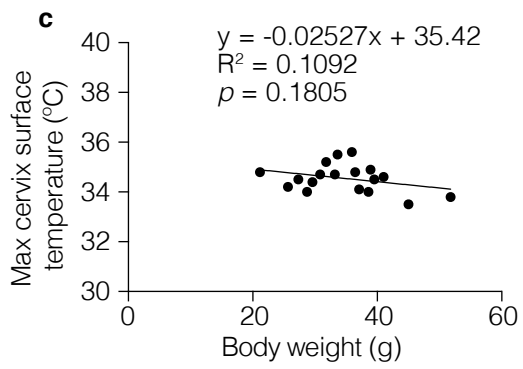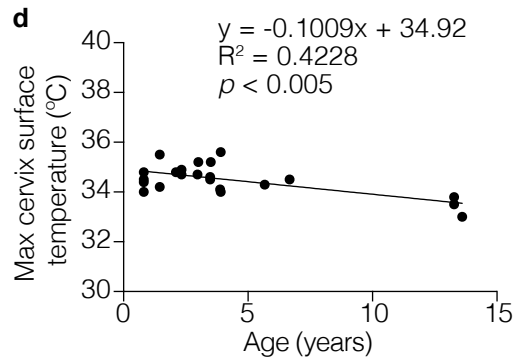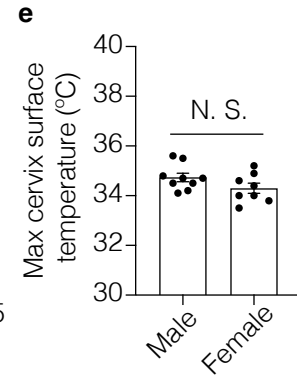

**Figure S5. Oxygen consumption rate and relationships between the body temperature and body weight, age, and sex of socially isolated subordinate naked mole-rats (NMRs; *Heterocephalus glaber*)**

**(a)** Images and air temperatures (measured using a mercury thermometer) of the colony inside or outside the nest (position 1–3) and inside the chamber used for social isolation. The data are presented as mean  $\pm$  S.D. and were analyzed using one-way analysis of variance, followed by Dunnett's multiple comparison test with a single pooled variance (the chamber for social isolation was used as a control). \*  $p < 0.05$ . **(b)**

Average oxygen consumption rates of the NMRs in a socially isolated state measured in a metabolic cage in a non-cold environment ( $n = 5$  queens, 7 subordinates, and 5 reproductive males). Data collected over 4 h in the daytime after a 2-h habituation period. Data are presented as mean  $\pm$  SEM and were analyzed using one-way analysis of variance, followed by Tukey's multiple comparison test with a single pooled variance for multiple comparisons (N.S. indicates nonsignificant difference between the groups),

**(c–e)** Maximum cervix surface temperatures of socially isolated subordinate NMRs monitored by thermal camera according to their **(c)** body weight, **(d)** age, and **(e)** sex.

Simple linear regression analysis was performed in (c) and (d).  $R^2$ ; coefficient determination. In (e), data are presented as means  $\pm$  SD. N.S. indicates nonsignificant difference (unpaired  $t$ -test).

Table S1. Primer sequences

|                      |                          |
|----------------------|--------------------------|
| NMR-UCP1-F           | CCTCTCCAGTGGATGTGGTG     |
| NMR-UCP1-R           | TGCTCAAAGCACACAAACAT     |
| NMR-ZIC1-F           | AGCCCTTCAAGTGCGAGTTCGAG  |
| NMR-ZIC1-R           | CTTGCAGAGATAGGGCTTGTCAC  |
| NMR-PGC1 $\alpha$ -F | CACAGGATCAGAACAAACCC     |
| NMR-PGC1 $\alpha$ -R | CAGATACTTGAGAAGCTCCGA    |
| NMR-DIO2-F           | AGCTTTCTGCTCGATGCC       |
| NMR-DIO2-R           | TCCTGGACACCGTTTCCGCTA    |
| NMR-TBX1-F           | ACGGCCACATTATTCTCAACTCCA |
| NMR-TBX1-R           | AAGCGCGTCTCCTCGAACACA    |
| NMR-CITED1-F         | CCGGCCCTTCGCTTTCACAC     |
| NMR-CITED1-R         | TCAGCTCAGTGGTGCCCCTT     |
| NMR-ACTB-F           | AGACCTTCAACACCCAGCCATGT  |
| NMR-ACTB-R           | GGCCAGCCAGGTCCAGACGCAG   |

Table S2. Relative humidity in our experiments

| Location               | Relative Humidity |
|------------------------|-------------------|
| Colony cage at 30°C    | 69–80%            |
| Isolation cage at 30°C | 61–62%            |
| Isolation cage at 20°C | 45–50%            |

Table S3. Giving birth date and experimental date

| Experiment                                                     | Individual No. | Duration from last giving birth date to experimental date | Duration from experimental date to next giving birth date |
|----------------------------------------------------------------|----------------|-----------------------------------------------------------|-----------------------------------------------------------|
| Measurement of O <sub>2</sub> consumption rate                 | 1              | 237                                                       | no giving birth                                           |
|                                                                | 2              | 328                                                       | 130                                                       |
|                                                                | 3              | 60                                                        | 22                                                        |
|                                                                | 4              | 47                                                        | 175                                                       |
|                                                                | 5              | 94                                                        | 132                                                       |
| Monitoring the body surface temperature at 30 °C with Saline   | 1              | 118                                                       | no giving birth                                           |
|                                                                | 2              | 340                                                       | 118                                                       |
|                                                                | 3              | 118                                                       | no giving birth                                           |
|                                                                | 4              | 290                                                       | 71                                                        |
|                                                                | 6              | 414                                                       | 343                                                       |
| Monitoring the body surface temperature at 30 °C with SR59230A | 1              | 132                                                       | no giving birth                                           |
|                                                                | 2              | 354                                                       | 104                                                       |
|                                                                | 3              | 115                                                       | no giving birth                                           |
|                                                                | 4              | 287                                                       | 74                                                        |
|                                                                | 6              | 411                                                       | 346                                                       |



**Video S1. Uptake of 2-deoxy-2-[<sup>18</sup>F]fluoro-D-glucose ([<sup>18</sup>F]FDG) in the brown adipose tissue (BAT) of naked mole-rats (NMRs; *Heterocephalus glaber*)**

The NMRs were administered 1 mg/kg noradrenaline, after which 11 MBq [<sup>18</sup>F]FDG was injected into the abdominal cavity. Positron emission tomography/computed tomography (PET-CT) images were then acquired 1 h after [<sup>18</sup>F]FDG administration.

The oblong signal is a microchip for individual identification.
